# Supplementary material for: Circulating microRNAs Showed Specific Responses according to Metabolic Syndrome Components and Sex of Adults from a Population-Based Study
Source: MDPI journal article supplement (doi:10.3390/metabo13010002), 2022-12-20
Supplement: s1 [file s1]

**Table S1.** Levels of 21 miRNAs in plasma of the adults from a population-based study grouped by Body Mass Index.

| Fold change             | Body Mass Index        |                        | p-value |
|-------------------------|------------------------|------------------------|---------|
|                         | < 25 kg/m <sup>2</sup> | > 25 kg/m <sup>2</sup> |         |
| miR-15a                 | 1.2<br>(1.1,1.4)       | 1.2<br>(1.1,1.4)       | 0.940   |
| miR-16                  | 1.6<br>(1.3,2.0)       | 1.3<br>(1.2,1.5)       | 0.146   |
| miR-21                  | 1.3<br>(1.0,1.6)       | 1.4<br>(1.2,1.7)       | 0.498   |
| miR-28-3p <sup>*</sup>  | 1.6<br>(1.2,2.0)       | 1.6<br>(1.3,2.0)       | 0.760   |
| miR-30a-5p              | 1.1<br>(1.0,1.3)       | 1.2<br>(1.0,1.3)       | 0.661   |
| miR-30d                 | 1.3<br>(1.0,1.6)       | 1.4<br>(1.1,1.6)       | 0.661   |
| miR-122                 | 1.7<br>(1.0,2.3)       | 2.2<br>(1.4,3.0)       | 0.245   |
| miR-126                 | 1.3<br>(1.0,1.5)       | 1.2<br>(1.1,1.4)       | 0.874   |
| miR-130b <sup>*</sup>   | 1.4<br>(1.2,1.7)       | 1.3<br>(1.1,1.5)       | 0.440   |
| miR-139-3p <sup>#</sup> | 0.5<br>(0.4,0.6)       | 0.5<br>(0.4,0.5)       | 0.423   |
| miR-140-5p <sup>§</sup> | 1.3<br>(1.0,1.5)       | 1.1<br>(0.9,1.3)       | 0.302   |
| miR-146a                | 1.5<br>(1.1,1.8)       | 1.7<br>(1.4,1.9)       | 0.395   |
| miR-150                 | 1.3<br>(1.0,1.6)       | 1.2<br>(1.0,1.5)       | 0.790   |
| miR-222 <sup>**</sup>   | 1.3<br>(1.0,1.5)       | 1.4<br>(1.2,1.7)       | 0.311   |
| miR-223 <sup>**</sup>   | 1.9<br>(1.4,2.3)       | 1.6<br>(1.3,2.0)       | 0.444   |
| miR-363 <sup>**</sup>   | 1.3<br>(1.1,1.5)       | 1.2<br>(1.0,1.3)       | 0.325   |
| miR-375                 | 1.7<br>(1.2,2.3)       | 1.2<br>(1.0,1.4)       | 0.066   |
| miR-376a                | 1.9<br>(1.2,2.6)       | 2.0<br>(1.6,2.4)       | 0.920   |
| miR-486-5p              | 1.3<br>(1.1,1.5)       | 1.2<br>(1.1,1.3)       | 0.368   |
| miR-532-5p <sup>£</sup> | 1.4<br>(1.1,1.7)       | 1.3<br>(1.1,1.5)       | 0.539   |
| miR-let-7c              | 1.2<br>(0.9,1.6)       | 1.4<br>(1.2,1.6)       | 0.430   |

\*n=190; #n=142; §n=177; \*\*n=191; £n=185. Data are presented in mean with 95% confidence interval (in parenthesis). Differences assessed by Adjusted Wald test, being  $p < 0.05$  were statistically significant.
